# Supplementary material for: Developmentally programmed DNA splicing in Paramecium reveals short-distance crosstalk between DNA cleavage sites
Source: PubMed Central journal article supplement — Nucleic Acids Res. 2008 Apr 17;36(10):3244–51. doi: 10.1093/nar/gkn154 (PMC2425466; doi:10.1093/nar/gkn154), 2008-04-17
Supplement: gkn154_1.pdf [file gkn154_1.pdf]

**Supplementary Table.** *Paramecium* specific primers used in this study

| Oligo Name    | IES      | Gene                   | sequence (5'-3')                  | GenBank coordinates  | orientation |
|---------------|----------|------------------------|-----------------------------------|----------------------|-------------|
| G10           | 51G4404  | <i>G</i> <sup>51</sup> | AAAGGCTAATTTGGATGAATGAGCATTAAATC  | 7459-7428 (AJ010441) | -           |
| G11           |          |                        | GGACTACTTTTGAAATTGAATTATAACAAAGGC | 7486-7454            | -           |
| G13           |          |                        | TGCATATGTTACTGGAACCTGGATTGGTAGC   | 7293-7322            | +           |
| G18           |          |                        | ACTGTTGCTACACATTGTGCATATGTTACT    | 7276-7305            | +           |
| 51A1416-5'    | 51A1416  | <i>A</i> <sup>51</sup> | TGCTTCTGGGATTCTGCTAGTTCAAGTTGC    | 2460-2489 (L26124)   | +           |
| 51A1835-5'(3) | 51A1835  | <i>A</i> <sup>51</sup> | GGTTGCGTAACACTTCCTCTTAAATGTGAG    | 2849-2878            | +           |
| 51A1835-5'(4) |          |                        | GAAGTCTAATGGATAACCTTGTGGATGGAC    | 2908-2937            | +           |
| 51A1835-3'(4) |          |                        | AGACAAGTAGGGAATCCACTTCTAGTAATC    | 3184-3155            | -           |
| 51A1835-3'(3) |          |                        | GTAGTACAAGATTTTTCGACACAAGTTGAG    | 3229-3200            | -           |
| 51A2591-5'    | 51A2591  | <i>A</i> <sup>51</sup> | ACACCAAGCGAAACATGCACAGTCG         | 3747-3771            | +           |
| 51A2591-3'    |          |                        | TTTTATGGCATTAAAGCTTGTGTCAT        | 4222-4198            | -           |
| 51A2591-16    |          |                        | AATTGTAAATTGACTTCAGCAATAAAAAA     | 3621-3650            | +           |
| 51A2591-17    |          |                        | ATGTGTTTGGACTGGATTGGCATGTAGAAG    | 3650-3679            | +           |
| 51A6649-11(2) | 51A6649  | <i>A</i> <sup>51</sup> | GGATGCGTTACTAAATCCTCATGCTCAGCT    | 9094-9123            | +           |
| 51A6649-12(2) |          |                        | ACTGCACCTCTAACTTTAACAAGCGAAGCA    | 9019-9048            | +           |
| 51A6649-17(2) |          |                        | TGATCCTTCTATGCAAGCTGCTCTTACGGT    | 9718-9689            | -           |
| 51A6649-18(2) |          |                        | ATCCATAAGCATGGTCCGTTTGATCCTTCT    | 9738-9709            | -           |
| sm19-2        | sm19-576 | <i>sm19</i>            | AATTAAGCAAGAAAAGAAATAGAAAAACC     | 677-706 (AJ272425)   | +           |
| sm19-3        |          |                        | CTACAATAATGAGTCTAGCTGGTGGCACTG    | 726-755              | +           |
| sm19-4        |          |                        | GACAAGATCCTATATATTCAATTTACATTG    | 1028-999             | -           |
| sm19-6        |          |                        | ACTTAACATTTAATATATCCTGTCAATTC     | 958-929              | -           |

+ or - : Oligonucleotides are oriented relatively to the transcriptional direction of the genes.

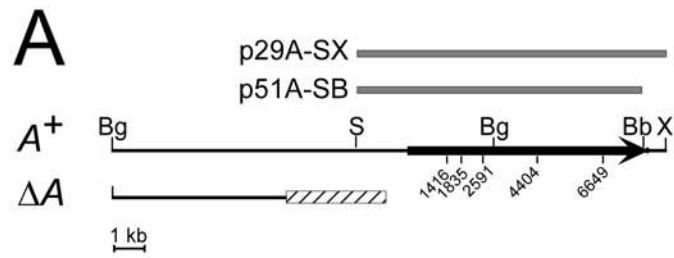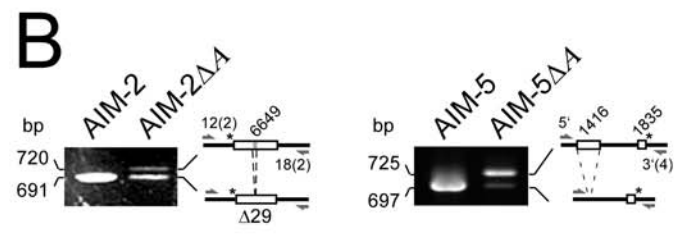

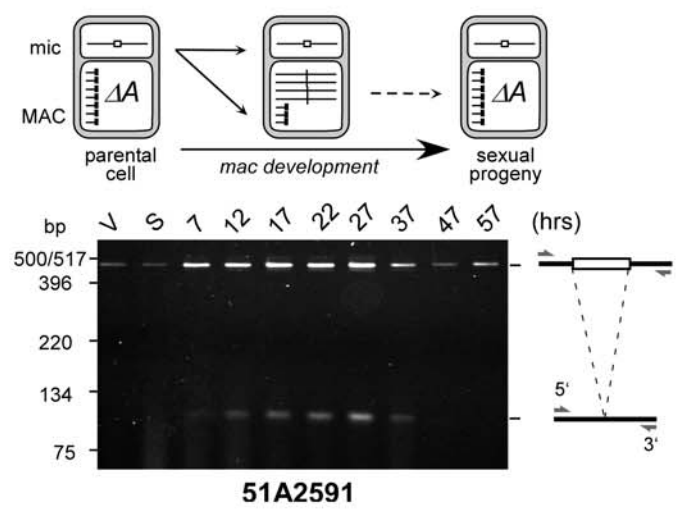

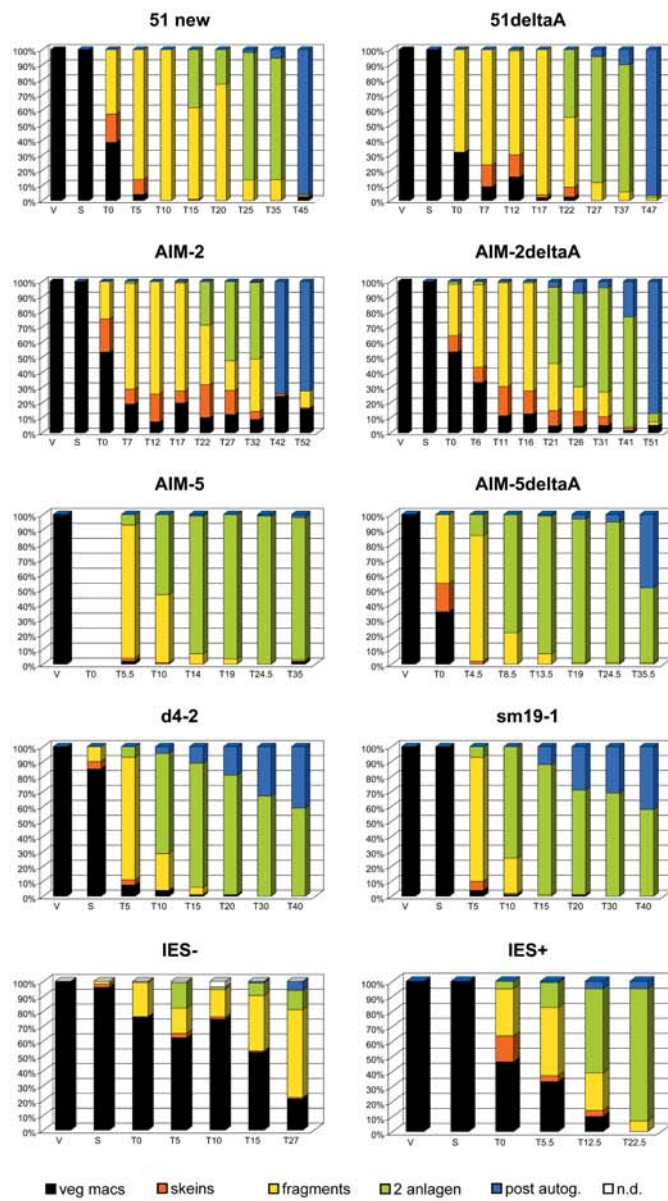

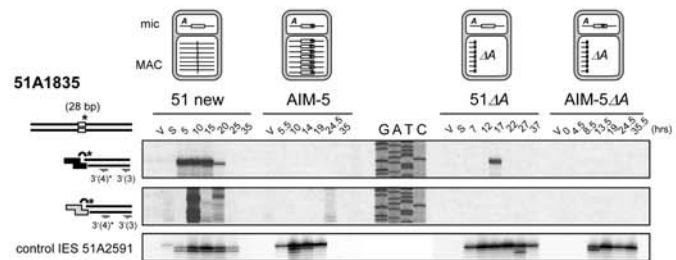

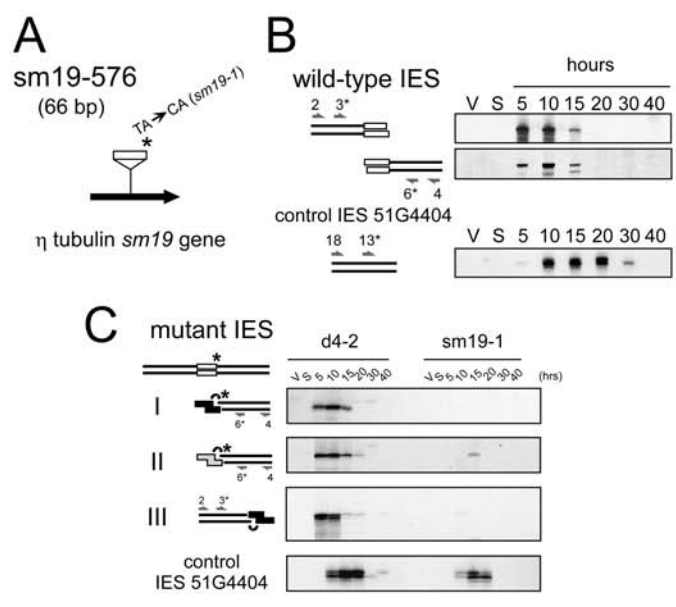

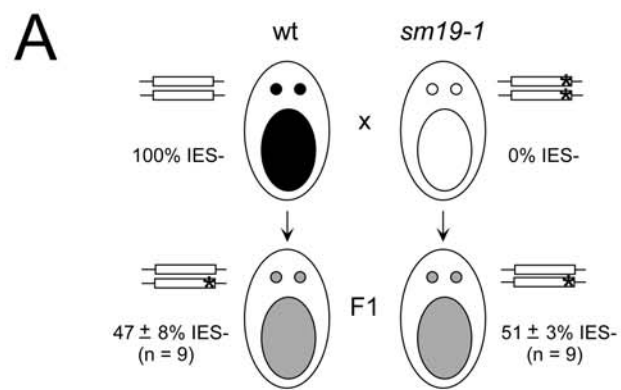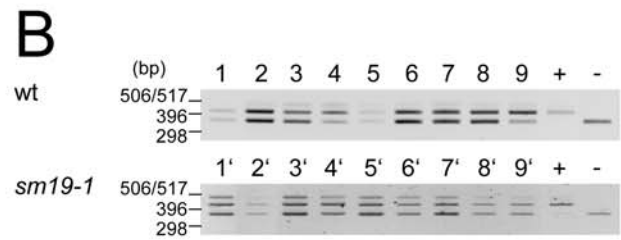

## Legends to Supplementary Figures

**Figure S1** Construction of the 51 $\Delta$ A, AIM-2 $\Delta$ A and AIM-5 $\Delta$ A macronuclear variants. **(A)** Schematic map of the macronuclear locus carrying the *A* gene (black arrow). Relevant restriction sites are indicated (Bb : *Bbs*I ; Bg: *Bgl*II; S: *Sal*I; X: *Xho*I). The structure of  $\Delta$ A macronuclear deletions is shown, with the variable telomere addition region represented by a hatched box. Cloned fragments injected for the induction of  $\Delta$ A macronuclear deletions are shown as gray lines. The position of the IESs analyzed in this study is shown on the map. **(B)** Estimation of the copy number of mutant IESs 51A6649 (left panel) and 51A1835 (right panel) in the vegetative macronucleus of variant strains AIM-2 $\Delta$ A and AIM-5 $\Delta$ A, respectively. PCR primers are indicated on each diagram. Electrophoresis was performed on 3% NuSieve agarose gels run in 1X TBE buffer. Left panel: the macronuclear form of mutant IES 51A6649 (bottom) differs from its micronuclear form (top) by the absence of an internal 29-bp IES. The AIM-2 $\Delta$ A variant exhibits a 1.3 ratio in its relative macro- to micronuclear copy numbers of IES 51A6649. Given that *P. tetraurelia* harbors two diploid micronuclei (i.e. 4 micronuclear copies of the IES per cell), this leads to 5.2 copies of IES 51A6649 in the macronucleus of the vegetative parental strain. Taking into account the  $\sim$ 800n ploidy of the macronucleus, this corresponds to  $\sim$ 6.5  $\times$  10<sup>-3</sup> IES copies per haploid genome (cphg), which is well below the threshold (0.1 cphg) above which maternal inhibition of excision is observed for this IES (Duharcourt *et al.* (1998) Mol. Cell. Biol. 18: 7075-7085). Right panel: the micronuclear fragment (top) includes mutant IES 51A1835 and neighboring IES 51A1416, which is excised from the macronuclear fragment (bottom). Based on the same calculations as for AIM-2 $\Delta$ A, an even lower 0.24 macro- to micronuclear ratio (i.e. 1.2  $\times$  10<sup>-3</sup> cphg) was estimated for IES 51A1835 in the AIM-5 $\Delta$ A variant.

**Figure S2** Excision of IESs 51A2591 during autogamy of a 51 $\Delta$ A macronuclear variant. Primers used for amplification of the excised (bottom band) and non-excised (top band) forms are indicated. PCR products amplified with the Expand Long Template PCR System were separated in a 3% NuSieve GTG agarose gel run in 0.5X TBE buffer. IES excision can be visualized directly, as demonstrated by the appearance of a 106-bp band in the T7-T37 samples. DNA sequencing confirmed that the corresponding excision junctions are precise (not shown). These disappear at the latest time-points (T47-T57), as a result of maternally controlled macronuclear deletion of the *A* gene.

**Figure S3** Progression of autogamy in starved cultures of strains 51 new, 51 $\Delta$ A, AIM-2, AIM-2 $\Delta$ A, AIM-5, AIM-5 $\Delta$ A, d4-2, d4-2 *sm19-1*, a wt cell line from stock 51 new (IES<sup>-</sup>) and its IES<sup>+</sup> macronuclear variant. At each time-point, at least 100 cells were stained with DAPI. V : vegetative cells ; S : starved cells with intact macronuclei. Time-points (in hours) are indicated below the x-axis of each graph. Cells with a single new macronucleus and variable numbers ( $\sim$  2 to 15) of fragments were considered as post-autogamous. In the experiment with the IES<sup>-</sup> cell line, « n.d. » refers to cells exhibiting unusual patterns.

**Figure S4** Effect of a germline TA to TG mutation at the right end of IES 51A1835 on the cleavage of the mutant end. Top : schematic representation of the *A* locus in the maternal macronucleus of each strain, with IES 51A1835 drawn as a white box and its mutant end marked with an asterisk. Bottom panels : LMPCR detection of broken chromosome ends in strains 51 new, AIM-5, 51 $\Delta$ A and AIM-5 $\Delta$ A, using linkers I'/(ATAT)J' (wt: shown in black for top panel) or I'/(ACAT)J' (mutant: shown in grey for middle panel). LMPCR primers are represented by arrows. As a size marker for both panels, we ran a DNA sequencing ladder of the cloned micronuclear locus. The same oligonucleotide was used for primer extension and



sequencing. Bottom panel: double strand breaks at the left end of control IES 51A2591 analyzed with linker I'/(GTAT)J' and oligonucleotides 51A2591-16 and 51A2591-17 for PCR and primer extension, respectively. Autogamy time-points are indicated. Note that the mutant linker is not able to ligate to the wild-type broken end: only non-specific LMPCR products are revealed in 51 new, while no band is detected in 51ΔA.

**Figure S5** Analysis of double strand cleavages at the ends of 66-bp IES sm19-576. (A) Map of mutant IES in stock d4-2 *sm19-1*, with a TA to CA mutation at its right end (\*). (B) Control experiment showing the detection of single-end cleaved IES sm19-576 during autogamy of wild-type strain d4-2. Linkers I'/(GTAG)J' and I'/(GTAT)J' were used for LMPCR analysis of the right (top panel) and left (middle panel) ends, respectively. (C) LMPCR detection of broken chromosome ends at the mutant and wild-type ends of IES sm19-576 during autogamy of strain d4-2 *sm19-1*. Analysis of the mutant right end was carried out with linkers I'/(CTAC)J' (panel I) or I'/(CTGC)J' (panel II). LMPCR linker I'/(ATAC)J' was used for the analysis of IES sm19-576 wild-type left end (panel III). In (B) and (C), bottom panels show the detection of double strand breaks at the left end of control IES 51G4404 analyzed with linker I'/(GTAT)J' and oligonucleotides 51G18 and 51G13 for PCR and primer extension, respectively. LMPCR primers are indicated by arrows and linkers by z-shaped boxes.

**Figure S6** Excision of wild-type IES sm19-576 in F1 heterozygotes from a d4-2 x d4-2 *sm19-1* cross. (A) Schematic diagram of the cross. The two copies of IES sm19-576 in each diploid micronucleus are displayed as white boxes next to each cell, with the mutant end marked with an asterisk. The overall % of IES sm19-576 excision in each macronucleus is indicated for each homozygous parent (top: d4-2 (wt) and d4-2 *sm19-1*) and its respective F1 progeny (bottom: average values calculated on each side of the cross for F1 heterozygotes issued from 9 independent conjugating pairs). (B) PCR analysis of IES sm19-576 excision in F1 progeny from 9 independent conjugating pairs. Primers sm19-2 and sm19-4 were used to amplify excised and non excised IES forms from total genomic DNA of vegetative cells and PCR products were resolved in 3% NuSieve agarose electrophoresis gels (+: mutant d4-2 *sm19-1* parent; -: wild-type d4-2 parent). Quantification of the IES- (352 bp) and IES+ (418 bp) forms was performed following ethidium bromide staining. In some lanes, a slow migrating species was shown to be an IES+ / IES- heteroduplex formed during the PCR reaction: it was taken into account for the calculation of the % of IES excision in each individual F1 (average value displayed in A).
